# Supplementary material for: Identification of Key Modules and Candidate Genes for Powdery Mildew Resistance of Wheat-Agropyron cristatum Translocation Line WAT-2020-17-6 by WGCNA
Source: MDPI journal article supplement (doi:10.3390/plants12020335), 2023-01-11
Supplement: s1 [file s1]

Table S1 Quality statistics of filtered reads

| Sample   | Raw reads | Clean reads<br>(reads containing joints<br>were removed; Filter to<br>remove low quality<br>data; Remove the N-<br>containing bases) | Clean bases | Error<br>rate | Q20   | Q30   | GC pct | Total map            |
|----------|-----------|--------------------------------------------------------------------------------------------------------------------------------------|-------------|---------------|-------|-------|--------|----------------------|
| C20-0-1  | 74329944  | 70901512                                                                                                                             | 10.64       | 0.02          | 98.37 | 95.07 | 52.57  | 64786849<br>(91.38%) |
| C20-0-2  | 69295888  | 66645510                                                                                                                             | 10.00       | 0.02          | 98.24 | 94.77 | 53.23  | 61227911<br>(91.87%) |
| C20-0-3  | 73463226  | 70133398                                                                                                                             | 10.52       | 0.02          | 98.15 | 94.56 | 52.84  | 63376741<br>(90.37%) |
| K21-0-1  | 71129920  | 67837416                                                                                                                             | 10.18       | 0.02          | 98.33 | 95.01 | 53.81  | 64008454<br>(94.36%) |
| K21-0-2  | 72050682  | 69105502                                                                                                                             | 10.37       | 0.02          | 98.24 | 94.87 | 51.83  | 63473225<br>(91.85%) |
| K21-0-3  | 68617620  | 66581486                                                                                                                             | 9.99        | 0.02          | 98.17 | 94.67 | 54.73  | 63275841<br>(95.04%) |
| C20-6-1  | 73603672  | 69372544                                                                                                                             | 10.41       | 0.02          | 98.15 | 94.62 | 51.93  | 62625848<br>(90.27%) |
| C20-6-2  | 74901032  | 71097492                                                                                                                             | 10.66       | 0.02          | 98.27 | 94.91 | 52.24  | 64232139<br>(90.34%) |
| C20-6-3  | 72201846  | 68808570                                                                                                                             | 10.32       | 0.02          | 98.04 | 94.43 | 53.24  | 61655857<br>(89.6%)  |
| K21-6-1  | 73612678  | 68599148                                                                                                                             | 10.29       | 0.02          | 98.33 | 95.00 | 51.04  | 65109870<br>(94.91%) |
| K21-6-2  | 76316924  | 73296994                                                                                                                             | 10.99       | 0.02          | 98.24 | 94.82 | 53.12  | 69454469<br>(94.76%) |
| K21-6-3  | 73366606  | 70271554                                                                                                                             | 10.54       | 0.02          | 98.29 | 94.96 | 54.41  | 65488394<br>(93.19%) |
| C20-12-1 | 81514510  | 78904414                                                                                                                             | 11.84       | 0.02          | 98.14 | 94.52 | 52.75  | 71670793<br>(90.83%) |
| C20-12-2 | 76689442  | 72639574                                                                                                                             | 10.90       | 0.02          | 98.20 | 94.75 | 51.82  | 63344584<br>(87.2%)  |
| C20-12-3 | 76655910  | 71779036                                                                                                                             | 10.77       | 0.03          | 97.33 | 93.43 | 51.13  | 60943198<br>(84.9%)  |
| K21-12-1 | 74348258  | 71084614                                                                                                                             | 10.66       | 0.02          | 98.27 | 94.9  | 52.65  | 67261225<br>(94.62%) |
| K21-12-2 | 70068074  | 67146424                                                                                                                             | 10.07       | 0.02          | 98.32 | 95.01 | 52.66  | 63255311<br>(94.21%) |
| K21-12-3 | 72378562  | 69272508                                                                                                                             | 10.39       | 0.02          | 98.17 | 94.71 | 52.81  | 65499378<br>(94.55%) |
| C20-24-1 | 76418740  | 72224054                                                                                                                             | 10.83       | 0.02          | 98.16 | 94.79 | 51.83  | 65076666<br>(90.1%)  |
| C20-24-2 | 82383450  | 78901534                                                                                                                             | 11.84       | 0.02          | 98.25 | 94.96 | 51.79  | 71327362             |

|          |          |          |       |      |       |       |       |                      |
|----------|----------|----------|-------|------|-------|-------|-------|----------------------|
|          |          |          |       |      |       |       |       | (90.4%)              |
| C20-24-3 | 78380384 | 75432404 | 11.31 | 0.02 | 98.15 | 94.61 | 52.72 | 67967240<br>(90.1%)  |
| K20-24-1 | 71517444 | 67867966 | 10.18 | 0.02 | 98.25 | 94.84 | 52.34 | 63640713<br>(93.77%) |
| K20-24-2 | 76617038 | 73008600 | 10.95 | 0.02 | 98.27 | 94.89 | 53.06 | 69135945<br>(94.7%)  |
| K20-24-3 | 72020504 | 68395702 | 10.26 | 0.02 | 98.2  | 94.83 | 51.37 | 63605715<br>(93.0%)  |
| C20-36-1 | 69323186 | 66988008 | 10.05 | 0.02 | 98.06 | 94.35 | 52.64 | 59702275<br>(89.12%) |
| C20-36-2 | 73112604 | 69390404 | 10.41 | 0.02 | 98.26 | 94.94 | 52.39 | 62574354<br>(90.18%) |
| C20-36-3 | 73557076 | 70350926 | 10.55 | 0.02 | 98.26 | 94.85 | 52.21 | 63581884<br>(90.38%) |
| K21-36-1 | 78900430 | 75344944 | 11.30 | 0.02 | 98.18 | 94.78 | 52.07 | 70496878<br>(93.57%) |
| K21-36-2 | 74086570 | 71480784 | 10.72 | 0.03 | 97.89 | 94.12 | 52.15 | 66746889<br>(93.38%) |
| K21-36-3 | 77342208 | 73627756 | 11.04 | 0.02 | 98.27 | 94.90 | 51.91 | 68798628<br>(93.44%) |
| C20-48-1 | 75374612 | 73306024 | 11.00 | 0.03 | 97.90 | 93.90 | 51.8  | 64578124<br>(88.09%) |
| C20-48-2 | 74596028 | 70003078 | 10.50 | 0.03 | 97.14 | 92.45 | 51.02 | 61113137<br>(87.3%)  |
| C20-48-3 | 71938586 | 67038458 | 10.06 | 0.03 | 97.28 | 92.5  | 51.61 | 58317953<br>(86.99%) |
| K21-48-1 | 74694000 | 71583886 | 10.74 | 0.02 | 98.19 | 94.74 | 51.64 | 67038491<br>(93.65%) |
| K21-48-2 | 72508090 | 68457424 | 10.27 | 0.02 | 98.17 | 94.66 | 51.42 | 62169062<br>(90.81%) |
| K21-48-3 | 71745742 | 67671280 | 10.15 | 0.03 | 97.2  | 92.58 | 51.51 | 61681869<br>(91.15%) |
| C20-72-1 | 71798268 | 68105932 | 10.22 | 0.02 | 98.06 | 94.56 | 51.83 | 60717952<br>(89.15%) |
| C20-72-2 | 69438522 | 66322256 | 9.95  | 0.02 | 98.18 | 94.68 | 51.52 | 58201923<br>(87.76%) |
| C20-72-3 | 71051422 | 67827946 | 10.17 | 0.02 | 98.24 | 94.81 | 51.09 | 60019186<br>(88.49%) |
| K21-72-1 | 76361728 | 73655514 | 11.05 | 0.02 | 98.26 | 94.85 | 51.34 | 69153612<br>(93.89%) |
| K21-72-2 | 87899794 | 81884098 | 12.28 | 0.03 | 97.71 | 93.86 | 50.69 | 75292296<br>(91.95%) |
| K21-72-3 | 74460290 | 71517908 | 10.73 | 0.02 | 98.31 | 94.95 | 52.74 | 67614580             |

|          |          |          |       |      |       |       |       |                      |
|----------|----------|----------|-------|------|-------|-------|-------|----------------------|
|          |          |          |       |      |       |       |       | (94.54%)             |
| C20-96-1 | 72532166 | 69564404 | 10.43 | 0.02 | 98.27 | 94.86 | 53.2  | 61353800<br>(88.2%)  |
| C20-96-2 | 72121048 | 69782026 | 10.47 | 0.02 | 98.11 | 94.50 | 53.49 | 62558127<br>(89.65%) |
| C20-96-3 | 79864278 | 76983604 | 11.55 | 0.02 | 98.19 | 94.72 | 53.38 | 69509647<br>(90.29%) |
| K21-96-1 | 72347372 | 69204966 | 10.38 | 0.02 | 98.28 | 94.96 | 53.32 | 64678812<br>(93.46%) |
| K21-96-2 | 76162968 | 71149870 | 10.67 | 0.03 | 97.27 | 92.54 | 52.33 | 65860477<br>(92.57%) |
| K21-96-3 | 71923710 | 68665342 | 10.30 | 0.03 | 97.24 | 92.54 | 51.96 | 63070229<br>(91.85%) |
