# Supplementary material for: Identification of Key Modules and Candidate Genes for Powdery Mildew Resistance of Wheat-Agropyron cristatum Translocation Line WAT-2020-17-6 by WGCNA
Source: MDPI journal article supplement (doi:10.3390/plants12020335), 2023-01-11
Supplement: s1 [file s1]

Table S2 Primer sequences information used for quantitative real-time PCR

| Gene ID            | Forward primer (5'–3') | Reverse primer (5'–3') |
|--------------------|------------------------|------------------------|
| TraesCS1A02G225200 | GACGAAGGCGATGAAGAA     | TCCGACAATGCGGTTATG     |
| TraesCS6A02G281300 | GCCTACTACGCCAAATGC     | AATCAGCCAGGTAAAGAGC    |
| novel.8020         | ATGGCGGTGGATAATAGG     | CATAACAGGAGGGAGTGC     |
| TraesCS6D02G008600 | CTCCTCGCACATCCATCA     | CGTCCACGTACCCGTATTG    |
| novel.10169        | TGGTGGATAGTCAGGCTTCT   | CGACCCAACATTCAGAGCA    |
| TraesCS1B02G274700 | AATGCTGCTGCCGTGCTT     | CTTGGTCCTCTTGGAGTTGAT  |
| TraesCS5D02G450500 | GCACAGCAAGGCACAACAA    | CTTCTGCTCTGGGCTCACC    |
| TraesCS7D02G526100 | CCGTGTATGCGAGGATGA     | CCAGCAGGGACAAGCAAC     |
| TraesCS5D02G265500 | GCCGCTTCGTCTTCTTCA     | GGTCTTGCCGTTCTGCTC     |
| TraesCS5B02G426500 | GCGTCAGCAGCAGGAACT     | GCTGGATGTAGCCCACGAT    |
| TraesCS5A02G332900 | GGGAGGAAGATGAGGAGCAGG  | TCGGCGATCAGGCGGTAC     |
| novel.7975         | GCGGAGGTTTCAGAGGATA    | TGAGTGGGTGTTGCGTAT     |
